# Supplementary material for: The gut microbiota promotes hepatic fatty acid desaturation and elongation in mice
Source: PubMed Central journal article supplement (PMC6138742; doi:10.1038/s41467-018-05767-4), 2018-09-14
Supplement: 41467_2018_5767_MOESM3_ESM.pdf [file 41467_2018_5767_MOESM3_ESM.pdf]

## Description of Additional Supplementary Files

**File name:** Supplementary Data 1:

**Description:** Transcriptomic data of liver samples from SPF and GF mice (n=6/6).

**File name:** Supplementary Data 2:

**Description:** Proteomic data of liver samples from SPF and GF mice (n=5/5).

**File name:** Supplementary Data 3:

**Description:** Phosphoproteomic data of liver samples from SPF and GF mice (n=5/5).

**File name:** Supplementary Data 4:

**Description:** Lipidomic data of liver samples from SPF and GF mice from experiment 1 (GF: n = 6, SPF: n = 6) and experiment 2 (SPF: n = 14; GF: n = 12)
